# Supplementary material
Source: PubMed Central journal article supplement (PMC3020718)

## SUPPLEMENTAL DATA

Griesser et al., Autoxidative and COX-2 catalyzed transformation of the dietary chemopreventive agent curcumin

### **Supplemental Fig. S1.**

Nomenclature and carbon numbering of curcumin and its main oxygenated metabolite (**1**).

### **Supplemental Fig. S2.**

MS2 spectra of the main oxygenated metabolite **1** of curcumin formed in unlabeled (MS2 of  $m/z$  399, top) and  $^{18}\text{O}$ -labeled buffer (MS2 of  $m/z$  401, below).

### **Supplemental Fig. S3.**

Predicted product formation by autoxidative and COX-2 catalyzed transformation of 4'-methoxycurcumin. MS2 spectra of the main oxygenated metabolite **1** of 4'-methoxycurcumin formed in unlabeled (MS2 of  $m/z$  413, middle) and  $^{18}\text{O}$ -labeled buffer (MS2 of  $m/z$  415, below).

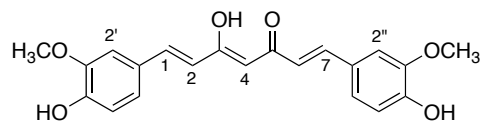

curcumin

(1*E*,4*Z*,6*E*)-5-hydroxy-1,7-*bis*(4-hydroxy-3-methoxyphenyl)hepta-1,4,6-trien-3-one

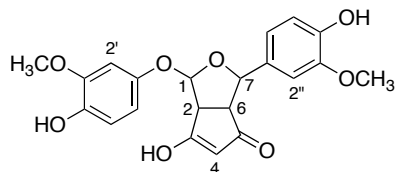

bicyclopentadione

(showing the curcumin-based numbering of carbons)

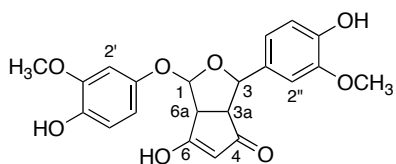

bicyclopentadione

(using chemically correct numbering of carbons)  
6-hydroxy-1-(4'-hydroxy-3'-methoxyphenoxy)-3-(4''-hydroxy-3''-methoxyphenyl)-3,3a-dihydro-1*H*-cyclopenta[*c*]furan-4(6a*H*)-one

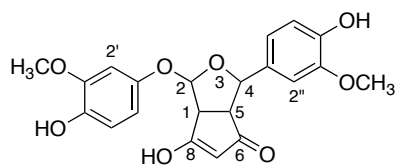

bicyclopentadione

(using alternative numbering of carbons, cf. Schneider et al. *J. Mol. Catal. B: Enzymatic*, 4 (1998), 219)  
2-(4'-hydroxy-3'-methoxyphenoxy)-4-(4''-hydroxy-3''-methoxyphenyl)-8-hydroxy-6-oxo-3-oxa-bicyclo[3.3.0]-7-octene

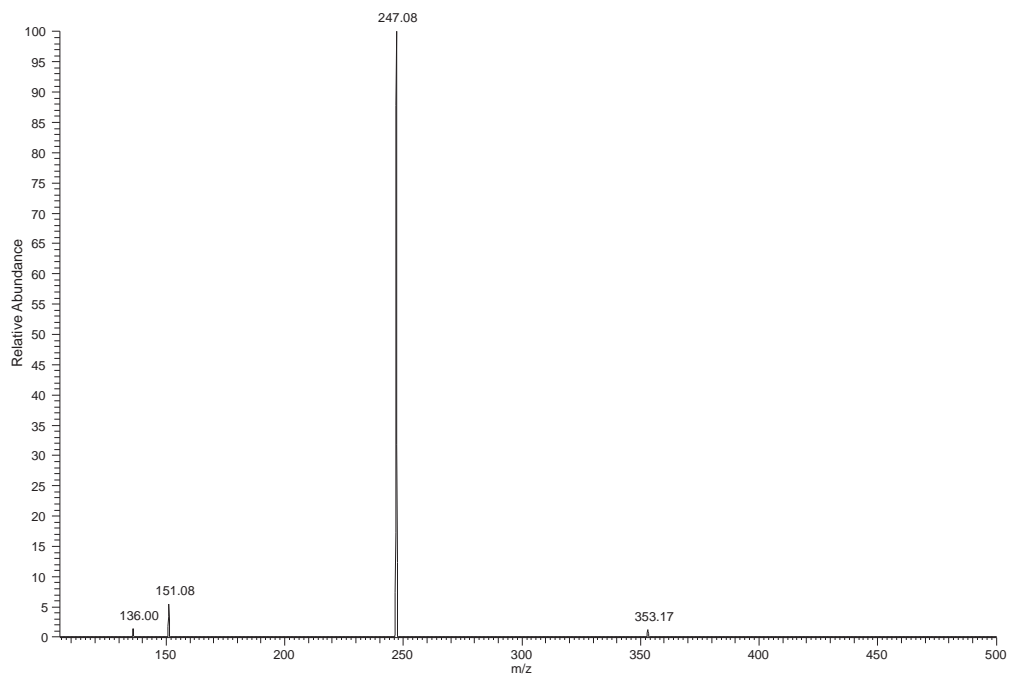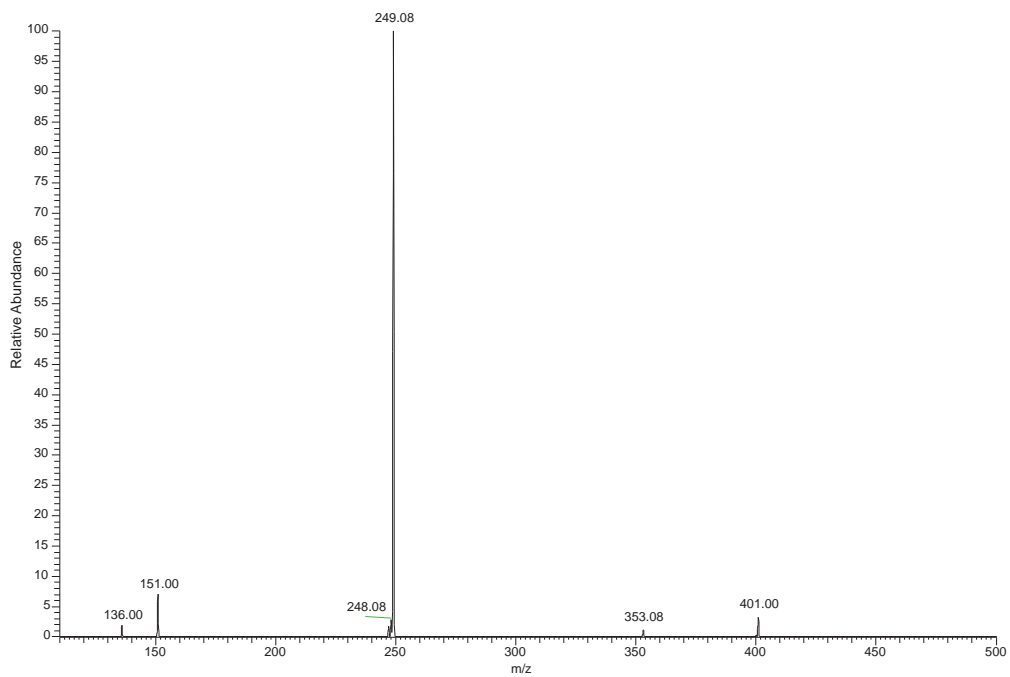

Supplemental Fig. S2, Griesser et al.

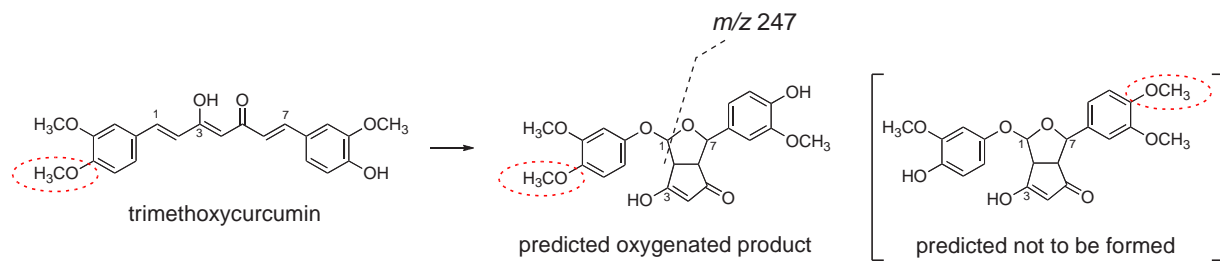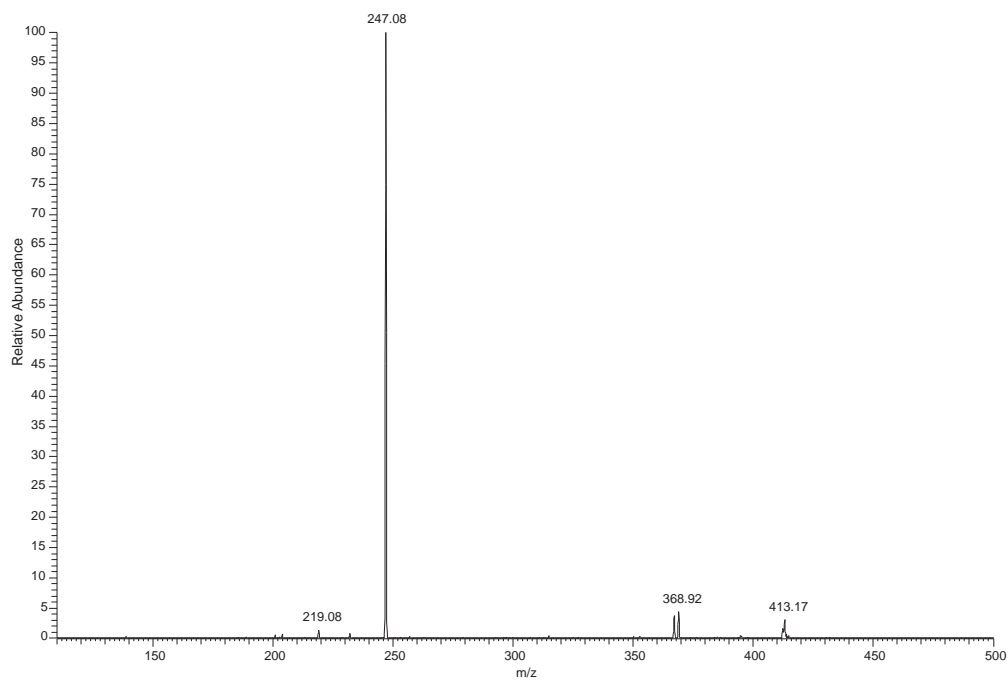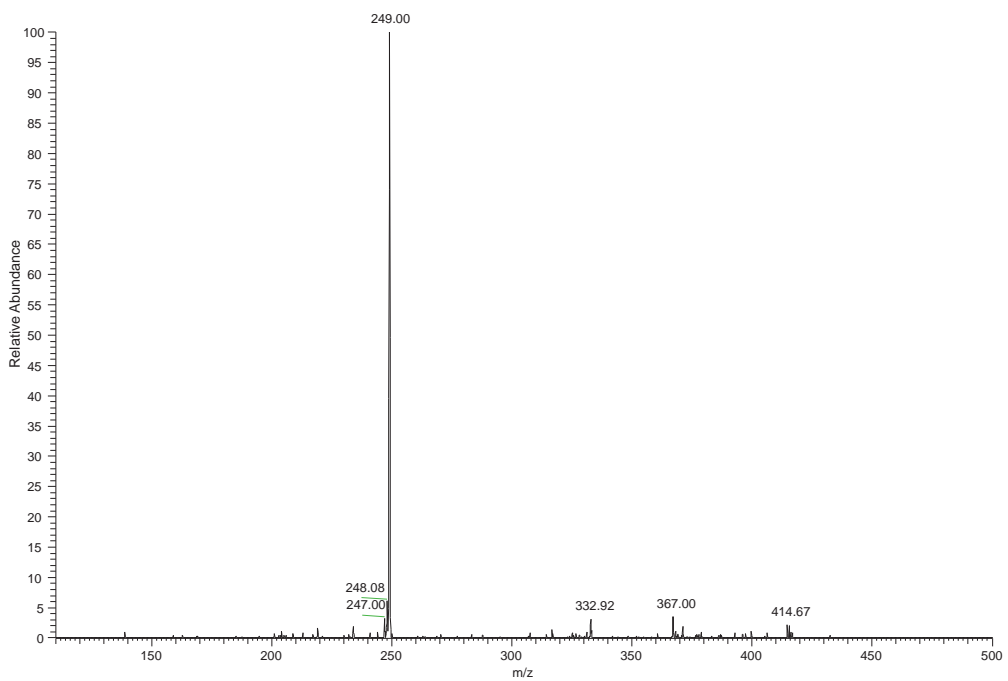

Supplement: supp_M110.178806_jbc.M110.178806-1.pdf [file supp_M110.178806_jbc.M110.178806-1.pdf]
